# Supplementary material for: Acute subdural haematoma in the elderly: to operate or not to operate? A systematic review and meta-analysis of outcomes following surgery
Source: HighWire-hosted journal article supplement (doi:10.1136/bmjopen-2021-050786), 2021-12-01
Supplement: bmjopen-2021-050786supp001_data_supplement.pdf [file bmjopen-2021-050786supp001_data_supplement.pdf]

**Supplementary Data 1.** Full search strategy for multi-database literature search.

**Search Strategy:**

All three searches used the same search terms and truncations. However, the three databases used a searched through a different method.

PubMed – Title/abstract

EMBASE – All fields

Cochrane Reviews – Title/abstract/keyword

**Search terms used in all three databases**

“subdural haematoma” OR “subdural hematoma” OR “subdural haemorrhage”, “subdural hematoma”

**AND**

Outcome\* OR Compar\* OR Morbid\* OR Mortality\* OR Complication\* OR reoccur\* recur\*

**AND**

Surg\* OR operati\* OR “non surgical” OR “non-surgical” OR “nonsurgical” OR “burrhole” OR “crani\*”

**AND**

Old\* OR frail\* OR geri\*OR elder\*

**Supplementary Data 2.** Subgroup analysis of studies published before and after 2000.

Studies published before 2000 were hypothesised to report poorer outcomes than studies published after 2000 given advances in healthcare *a priori*. Steps taken to test this are detailed below using mortality at discharge as the outcome measure.

| Study No. | Study, Year                 | Deaths at Discharge | Total |
|-----------|-----------------------------|---------------------|-------|
| 1         | Wilberger 1991 <sup>1</sup> | 23                  | 28    |
| 2         | Cagetti 1992 <sup>2</sup>   | 23                  | 26    |
| 3         | Kotwica 1992 <sup>3</sup>   | 23                  | 27    |
| 4         | Petridis 2009 <sup>4</sup>  | 64                  | 119   |
| 5         | Taussky 2012 <sup>5</sup>   | 13                  | 37    |
| 6         | Benedetto 2017 <sup>6</sup> | 37                  | 67    |
| 7         | Won 2017 <sup>7</sup>       | 13                  | 56    |
| 8         | Monsivais 2018 <sup>8</sup> | 47                  | 112   |
| 9         | Bus 2018 <sup>9</sup>       | 44                  | 84    |
| 10        | Akbik 2019 <sup>10</sup>    | 24                  | 62    |
| 11        | Trevisi 2020 <sup>11</sup>  | 51                  | 147   |
| 12        | Younsi 2020 <sup>12</sup>   | 9                   | 27    |

*Identifying influential/ outlying studies*

R code output demonstrating studies in descending order with respect to their residual estimates. Studies with z-value > 1.5 were considered as potential outliers.

|    | resid   | se     | z       |
|----|---------|--------|---------|
| 2  | 0.4342  | 0.2127 | 2.0413  |
| 3  | 0.3859  | 0.2199 | 1.7548  |
| 1  | 0.3444  | 0.2254 | 1.5277  |
| 7  | -0.3219 | 0.2179 | -1.4774 |
| 11 | -0.1899 | 0.2284 | -0.8318 |
| 12 | -0.1975 | 0.2440 | -0.8096 |
| 5  | -0.1800 | 0.2402 | -0.7496 |
| 10 | -0.1429 | 0.2372 | -0.6026 |
| 8  | -0.1084 | 0.2357 | -0.4597 |
| 6  | 0.0357  | 0.2407 | 0.1484  |
| 4  | 0.0204  | 0.2380 | 0.0857  |
| 9  | 0.0050  | 0.2397 | 0.0210  |

*Leave-one-out tests to ascertain whether outliers are influential*

|    | estimate | zval      | pval     | ci.lb    | ci.ub    | Q         | Qp       | tau2     | I2        | H2        |
|----|----------|-----------|----------|----------|----------|-----------|----------|----------|-----------|-----------|
| 1  | 0.490632 | 12.417732 | 0.000000 | 0.367038 | 0.614786 | 73.368265 | 0.000000 | 0.038132 | 91.171885 | 11.327446 |
| 2  | 0.483338 | 13.222985 | 0.000000 | 0.368397 | 0.599144 | 67.141710 | 0.000000 | 0.032437 | 89.808784 | 9.812371  |
| 3  | 0.487247 | 12.750372 | 0.000000 | 0.367424 | 0.607788 | 70.593036 | 0.000000 | 0.035606 | 90.617619 | 10.658275 |
| 4  | 0.517500 | 11.346678 | 0.000000 | 0.377123 | 0.656538 | 86.566590 | 0.000000 | 0.049536 | 92.163460 | 12.760734 |
| 5  | 0.533819 | 11.975985 | 0.000000 | 0.397708 | 0.667514 | 86.933142 | 0.000000 | 0.046334 | 92.524143 | 13.376393 |
| 6  | 0.516182 | 11.374204 | 0.000000 | 0.376397 | 0.654740 | 87.156905 | 0.000000 | 0.049256 | 92.633846 | 13.575606 |
| 7  | 0.545648 | 13.087135 | 0.000000 | 0.419060 | 0.669424 | 74.186796 | 0.000000 | 0.039037 | 91.016112 | 11.131038 |
| 8  | 0.528963 | 11.623067 | 0.000000 | 0.389688 | 0.666066 | 87.768239 | 0.000000 | 0.048445 | 92.068686 | 12.608251 |
| 9  | 0.518889 | 11.377863 | 0.000000 | 0.378617 | 0.657719 | 88.032457 | 0.000000 | 0.049508 | 92.499065 | 13.331671 |
| 10 | 0.531523 | 11.784654 | 0.000000 | 0.393656 | 0.667077 | 87.254073 | 0.000000 | 0.047480 | 92.431292 | 13.212294 |
| 11 | 0.536202 | 12.018474 | 0.000000 | 0.400142 | 0.669679 | 77.809426 | 0.000000 | 0.045792 | 91.306256 | 11.502524 |
| 12 | 0.534470 | 12.069039 | 0.000000 | 0.399278 | 0.667234 | 87.048828 | 0.000000 | 0.045823 | 92.553793 | 13.429656 |

|    | rstudent | dffits  | cook.d | cov.r  | tau2.del | QE.del  | hat    | weight | dfbs    | inf |
|----|----------|---------|--------|--------|----------|---------|--------|--------|---------|-----|
| 1  | 1.5277   | 0.4540  | 0.1835 | 0.9554 | 0.0381   | 73.3683 | 0.0776 | 7.7642 | 0.4562  |     |
| 2  | 2.0413   | 0.6096  | 0.2917 | 0.8271 | 0.0324   | 67.1417 | 0.0767 | 7.6678 | 0.6174  |     |
| 3  | 1.7548   | 0.5229  | 0.2306 | 0.8984 | 0.0356   | 70.5930 | 0.0772 | 7.7175 | 0.5271  |     |
| 4  | 0.0857   | 0.0161  | 0.0003 | 1.2231 | 0.0495   | 86.5666 | 0.0889 | 8.8917 | 0.0161  |     |
| 5  | -0.7496  | -0.2277 | 0.0543 | 1.1421 | 0.0463   | 86.9331 | 0.0809 | 8.0874 | -0.2275 |     |
| 6  | 0.1484   | 0.0353  | 0.0014 | 1.2133 | 0.0493   | 87.1569 | 0.0859 | 8.5907 | 0.0353  |     |
| 7  | -1.4774  | -0.4374 | 0.1720 | 0.9838 | 0.0390   | 74.1868 | 0.0846 | 8.4625 | -0.4371 |     |
| 8  | -0.4597  | -0.1513 | 0.0252 | 1.1985 | 0.0484   | 87.7682 | 0.0887 | 8.8666 | -0.1517 |     |
| 9  | 0.0210   | -0.0040 | 0.0000 | 1.2205 | 0.0495   | 88.0325 | 0.0873 | 8.7273 | -0.0040 |     |
| 10 | -0.6026  | -0.1909 | 0.0392 | 1.1731 | 0.0475   | 87.2541 | 0.0854 | 8.5376 | -0.1910 |     |
| 11 | -0.8318  | -0.2643 | 0.0727 | 1.1406 | 0.0458   | 77.8094 | 0.0897 | 8.9692 | -0.2646 |     |
| 12 | -0.8096  | -0.2388 | 0.0591 | 1.1264 | 0.0458   | 87.0488 | 0.0772 | 7.7175 | -0.2385 |     |

***Moderator analysis (using pre/post 2000 as moderator and logit transformation for each group)***

Fixed-Effects with Moderators Model (k = 2)

I<sup>2</sup> (residual heterogeneity / unaccounted variability): 0.00%H<sup>2</sup> (unaccounted variability / sampling variability): 1.00

Test for Residual Heterogeneity:

QE(df = 0) = 0.000, p-val = 1.000

Test of Moderators (coefficient 2):

QM(df = 1) = 48.197, p-val &lt; .001

Model Results:

|                  | estimate | se    | zval   | pval  | ci.lb | ci.ub |     |
|------------------|----------|-------|--------|-------|-------|-------|-----|
| intrcpt          | 0.701    | 0.037 | 19.132 | <.001 | 0.629 | 0.773 | *** |
| studyyearpre2000 | 0.459    | 0.066 | 6.942  | <.001 | 0.329 | 0.589 | *** |

---

Signif. codes: 0 '\*\*\*' 0.001 '\*\*' 0.01 '\*' 0.05 '.' 0.1 ' ' 1

**Supplementary Data 3.** Indications for conservative management in included studies, and subsequent mortality/ outcomes.

| Author, Year                       | No. of Patients | At Discharge (N, %) |           |           | At Long Term Follow Up (N, %) |           |           |          | Indications                                                                                                                                                                               |
|------------------------------------|-----------------|---------------------|-----------|-----------|-------------------------------|-----------|-----------|----------|-------------------------------------------------------------------------------------------------------------------------------------------------------------------------------------------|
|                                    |                 | Deaths              | GOS 1 – 3 | GOS 4 – 5 | Deaths                        | GOS 1 – 3 | GOS 4 – 5 | Duration |                                                                                                                                                                                           |
| Taussky et al., 2012 <sup>5</sup>  | 5               | -                   | -         | -         | -                             | 5         | 0         | 6        | Any patients not fulfilling criteria for surgery (see <b>Supplementary Table 2</b> ), or with bilaterally fixed pupils.                                                                   |
| Won et al., 2017 <sup>7</sup>      | 7               | -                   | -         | -         | 5                             | 7         | 0         | 3        | Not specified. Seven out of 68 patients were managed conservatively due to inoperable comorbidities.                                                                                      |
| Sufaro et al., 2019 <sup>13</sup>  | 26              | 2                   | -         | -         | 9                             | -         | -         | 12       | No specific indications for conservative management given. No significant differences between surgical and conservative groups except for ASDH thickness and focal neurological deficit.  |
| Trevisi et al., 2020 <sup>11</sup> | 66              | 14                  | 21        | 45        | 21                            | 27        | 39        | 6        | No specific indications for conservative management. Significantly larger proportion of conservatively managed patients in GCS 13 - 15 category (77%) compared with surgical (36%) group. |

**Supplementary Data 4.** Indications for surgical intervention in included studies.

| <b>Author, Year</b>                 | <b>Indication/ Prerequisites</b>                                                                                                                                                                                                                                                                                                                                                                                                                                                                                                       |
|-------------------------------------|----------------------------------------------------------------------------------------------------------------------------------------------------------------------------------------------------------------------------------------------------------------------------------------------------------------------------------------------------------------------------------------------------------------------------------------------------------------------------------------------------------------------------------------|
| Wilberger et al., 1991 <sup>1</sup> | Surgical indication not specified.<br>All included patients had ASDH thickness $\geq$ 3mm and MLS $>$ 5 mm.<br>Following patients were excluded from analyses: <ul style="list-style-type: none"> <li>• Timing of surgery could not be determined</li> <li>• Open head injuries, prolonged hypotension/ hypoxia, severe life-threatening extra-cranial injuries</li> </ul>                                                                                                                                                             |
| Massaro et al., 1996 <sup>14</sup>  | Surgical indications- MLS $>$ 5 mm<br>Following patients were excluded- open head injury, prolonged hypotension, hypoxia or severe life threatening injuries                                                                                                                                                                                                                                                                                                                                                                           |
| Koc et al., 1997 <sup>15</sup>      | Surgical indications- ASDH thickness $>$ 10mm, MLS $>$ 5 mm                                                                                                                                                                                                                                                                                                                                                                                                                                                                            |
| Taussky et al., 2012 <sup>5</sup>   | Following patients considered suitable for surgical intervention: <ul style="list-style-type: none"> <li>• Pre-morbid functional status- KPS of at least 80, usually independent</li> <li>• Co-morbidities- no evidence of dementia, no comorbidities limiting survival to less than 12 months</li> <li>• Surgical indications- MLS <math>\geq</math>5mm; GCS <math>\leq</math>13</li> </ul>                                                                                                                                           |
| Merzo et al., 2016 <sup>16</sup>    | Not specified for ASDH patients, though general indications for surgical intervention in TBI patients given                                                                                                                                                                                                                                                                                                                                                                                                                            |
| Raj et al., 2016 <sup>17</sup>      | Brain trauma foundation guidelines                                                                                                                                                                                                                                                                                                                                                                                                                                                                                                     |
| Benedetto et al., 2017 <sup>6</sup> | Following patients considered suitable for surgical intervention: <ul style="list-style-type: none"> <li>• ASDH thickness <math>&gt;</math> 10 mm or MLS <math>&gt;</math>5 mm with patient of any GCS</li> <li>• GCS drop of 2 points or more, with less severe ASDH thickness/ MLS</li> </ul> Following patients were excluded from analysis: <ul style="list-style-type: none"> <li>• Bilateral fixed pupils</li> <li>• Concomitant EDH or significant cerebral contusions</li> <li>• Major thoracic or abdominal trauma</li> </ul> |
| Monsivais et al., 2018 <sup>8</sup> | Following patients considered unsuitable for surgical intervention: <ul style="list-style-type: none"> <li>• Neurologically poor- GCS 3 - 5 with or without pupillary involvement with evidence of impending herniation on CT imaging</li> <li>• Haemodynamic instability, unsuitable for ventilation, or severe cardiac/ pulmonary compromise</li> </ul>                                                                                                                                                                              |

|                                         |                                                                                                                                                                                                                                                                                                                                                                                                                     |
|-----------------------------------------|---------------------------------------------------------------------------------------------------------------------------------------------------------------------------------------------------------------------------------------------------------------------------------------------------------------------------------------------------------------------------------------------------------------------|
|                                         | <ul style="list-style-type: none"> <li>Advanced malignancy with metastatic disease</li> </ul>                                                                                                                                                                                                                                                                                                                       |
| Sufaro et al., 2019 <sup>13</sup>       | <p>Following patients considered suitable for inclusion:</p> <ul style="list-style-type: none"> <li>GCS 13 - 15 and at least one of the following- ASDH thickness &gt; 10mm, MLS &gt; 5 mm, GCS drop of 2 points or more from time of injury</li> <li>Surgical intervention performed predominantly in patients with evolving hemiparesis</li> </ul> <p>Patients with significant major injuries were excluded.</p> |
| Trevisi et al., 2020 <sup>11</sup>      | <p>Following patients considered suitable for surgical intervention:</p> <ul style="list-style-type: none"> <li>ASDH thickness &gt; 10mm, MLS &gt;5 mm (unless other clinical features/ demographics/ baseline functional status were not in favour of surgical intervention- objective parameters not specified)</li> </ul>                                                                                        |
| Cagetti et al., 1992 <sup>2</sup>       | Not specified                                                                                                                                                                                                                                                                                                                                                                                                       |
| Kotwica & Jakubowski, 1992 <sup>3</sup> | Not specified                                                                                                                                                                                                                                                                                                                                                                                                       |
| Akbik et al., 2009 <sup>10</sup>        | Not specified                                                                                                                                                                                                                                                                                                                                                                                                       |
| Petridis et al., 2009 <sup>4</sup>      | Not specified                                                                                                                                                                                                                                                                                                                                                                                                       |
| Hamed et al., 2016 <sup>18</sup>        | Not specified                                                                                                                                                                                                                                                                                                                                                                                                       |
| Won et al., 2017 <sup>7</sup>           | Not specified                                                                                                                                                                                                                                                                                                                                                                                                       |
| Bus et al., 2019 <sup>9</sup>           | Not specified                                                                                                                                                                                                                                                                                                                                                                                                       |
| McGinity et al., 2017 <sup>19</sup>     | Not specified                                                                                                                                                                                                                                                                                                                                                                                                       |
| Younsi et al., 2020 <sup>12</sup>       | Not specified                                                                                                                                                                                                                                                                                                                                                                                                       |

**Supplementary Data 5.** Association between pre-operative neurological status and mortality/ poor outcome following surgical evacuation of ASDH in patients aged 60 years and above.

| Study                               | GCS                             | Outcome                      | Statistical Test                                                                     |
|-------------------------------------|---------------------------------|------------------------------|--------------------------------------------------------------------------------------|
| Jamjoom, 1992 <sup>20</sup>         | Dichotomised: $\geq 5$ vs $< 5$ | Dichotomised GOS             | Chi-squared test; NS                                                                 |
| Petridis et al., 2009 <sup>4</sup>  | Categorised: 13-15, 9-12, 3-8   | Mortality                    | Chi-squared test; $p < 0.001$                                                        |
| Raj et al., 2016 <sup>17</sup>      | Categorised: 13-15, 9-12, 3-8   | Mortality                    | Chi-squared test; $p < 0.001$                                                        |
| Benedetto et al., 2017 <sup>6</sup> | GCS                             | GOS (30 days)                | Univariate linear regression; RC 0.18, $p < 0.0001$                                  |
|                                     |                                 |                              | Multivariate linear regression; RC 0.17, $p < 0.0001$                                |
|                                     |                                 | GOS (6 months)               | Univariate linear regression; RC 0.20, $p < 0.0001$                                  |
|                                     |                                 |                              | Multivariate linear regression; RC 0.20, $p < 0.0001$                                |
| Won et al., 2017 <sup>7</sup>       | Dichotomised: $> 6$ vs $\leq 6$ | Mortality                    | Univariate logistic regression; OR 4.0, $p = 0.04$                                   |
|                                     |                                 | Dichotomised GOS (discharge) | Univariate logistic regression; OR 4.2, NS                                           |
|                                     |                                 | Dichotomised GOS (LTFU)      | Univariate logistic regression; OR 3.7, NS                                           |
| Monsivais et al., 2018 <sup>8</sup> | Dichotomised: $\geq 9$ vs $< 9$ | Mortality                    | Chi-squared test; $p = 0.01$<br>Multivariate logistic regression; OR 3.0, $p = 0.02$ |
| Akbik et al., 2019 <sup>10</sup>    | GCS (mean)                      | Mortality                    | Kruskal Wallis test; $p = 0.014$                                                     |
|                                     |                                 | Categorised GOS              | Kruskal Wallis test; $p = 0.016$                                                     |

|                                       |                        |                  |                                                     |
|---------------------------------------|------------------------|------------------|-----------------------------------------------------|
| Bus et al., 2019 <sup>9</sup>         | Categorised: 3-8, 9-15 | Dichotomised GOS | Chi-squared test; NS                                |
| Trevisi et al.,<br>2020 <sup>11</sup> | GCS                    | Dichotomised GOS | Univariate logistic regression; p < 0.001           |
|                                       |                        |                  | Multivariate logistic regression; OR 0.87, p = 0.04 |
|                                       | Dichotomised: >8 vs ≤8 | Dichotomised GOS | Chi-squared test; p < 0.001                         |

**Supplementary Data 6.** Association between pre-operative pupil reactivity to light and mortality/ poor outcome following surgical evacuation of ASDH in patients aged 60 years and above.

| Study                              | Pupils                                                              | Outcome                        | Statistical Test               |
|------------------------------------|---------------------------------------------------------------------|--------------------------------|--------------------------------|
| Jamjoom, 1992 <sup>20</sup>        | Non-reactive pupil(s)                                               | Dichotomised GOS               | Chi-squared test; p = 0.025    |
| Petridis et al., 2009 <sup>4</sup> | Bilaterally reactive, unilaterally reactive, bilaterally unreactive | Mortality<br>GOS (1 vs others) | Chi-squared test; p<0.001      |
| Raj et al., 2016 <sup>17</sup>     | Normal, abnormal                                                    | Mortality                      | Chi-squared test; NS           |
| Akbik et al., 2019 <sup>10</sup>   | Fixed and dilated, normal                                           | Mortality                      | Fisher's exact test; p = 0.021 |
|                                    |                                                                     | Categorised GOS                | Fisher's exact test; p = 0.009 |
| Bus et al., 2019 <sup>9</sup>      | Bilaterally dilated and unreactive                                  | Dichotomised GOS               | Fisher's exact test; p = 0.03  |
| Trevisi et al., 2020 <sup>11</sup> | Fixed pupils                                                        | Dichotomised GOS               | Chi-squared test; NS           |
| Younsi et al., 2020 <sup>12</sup>  | Anisocoria                                                          | Dichotomised GOS               | Fisher's exact test; NS        |

**Supplementary Data 7.** Summary of risk of bias assessment using ROBINS-I tool for all included studies.

|    | Study          | Cofounding | Selection | Classification | Deviation | Missing | Measurement | Reporting | Overall         |
|----|----------------|------------|-----------|----------------|-----------|---------|-------------|-----------|-----------------|
| 1  | Wilberger 1991 | Moderate   | Low       | Low            | Low       | Low     | Moderate    | Moderate  | <b>Moderate</b> |
| 2  | Cagetti 1992   | Serious    | NI        | Moderate       | Low       | Low     | Serious     | Moderate  | <b>Serious</b>  |
| 3  | Jamjoom 1992   | NI         | Low       | Low            | Low       | Low     | Moderate    | Moderate  | <b>Moderate</b> |
| 4  | Kotwica 1992   | Moderate   | Low       | Low            | Low       | Low     | Moderate    | Low       | <b>Moderate</b> |
| 5  | Massaro 1996   | Moderate   | Low       | Low            | Low       | Low     | Moderate    | Low       | <b>Moderate</b> |
| 6  | Koc 1997       | Moderate   | Low       | Low            | Low       | Low     | Moderate    | Low       | <b>Moderate</b> |
| 7  | Hanif 2009     | Moderate   | Low       | Low            | Low       | Low     | Moderate    | Low       | <b>Moderate</b> |
| 8  | Petridis 2009  | Moderate   | Low       | Low            | Low       | Low     | Moderate    | Low       | <b>Moderate</b> |
| 9  | Taussky 2012   | Moderate   | Low       | Low            | Low       | Low     | Moderate    | Low       | <b>Moderate</b> |
| 10 | Hamed 2016     | Serious    | Low       | Low            | Moderate  | Low     | Moderate    | Low       | <b>Serious</b>  |
| 11 | Merzo 2021     | Moderate   | Moderate  | Low            | Low       | Low     | Moderate    | Low       | <b>Moderate</b> |
| 12 | Raj 2016       | Moderate   | Moderate  | Low            | Low       | Low     | Moderate    | Low       | <b>Moderate</b> |
| 13 | Benedetto 2017 | Moderate   | Low       | Low            | Low       | Low     | Moderate    | Low       | <b>Moderate</b> |
| 14 | McGinity 2017  | Moderate   | Moderate  | Low            | Low       | Low     | Moderate    | Low       | <b>Moderate</b> |
| 15 | Won 2017       | Moderate   | Low       | Moderate       | Low       | Low     | Moderate    | Low       | <b>Moderate</b> |
| 16 | Bus 2018       | Moderate   | Low       | Low            | Low       | Low     | Moderate    | Moderate  | <b>Moderate</b> |
| 17 | Monsivai 2018  | Moderate   | Low       | Low            | Low       | Low     | Moderate    | Low       | <b>Moderate</b> |
| 18 | Akbik 2019     | Moderate   | Low       | Low            | Low       | Low     | Moderate    | Low       | <b>Moderate</b> |
| 19 | Sufaro 2019    | Serious    | Low       | Low            | Moderate  | Low     | Moderate    | Low       | <b>Serious</b>  |
| 20 | Trevisi 2020   | Moderate   | Low       | Low            | Low       | Low     | Moderate    | Low       | <b>Moderate</b> |
| 21 | Younsi 2020    | Moderate   | Low       | Low            | Low       | Serious | Moderate    | Low       | <b>Serious</b>  |

## References

1. Wilberger JE, Jr., Harris M, Diamond DL. Acute subdural hematoma: morbidity, mortality, and operative timing. *J Neurosurg.* 1991;74(2):212-218.
2. Cagetti B, Cossu M, Pau A, Rivano C, Viale G. The outcome from acute subdural and epidural intracranial haematomas in very elderly patients. *Br J Neurosurg.* 1992;6(3):227-231.
3. Kotwica Z, Jakubowski JK. Acute head injuries in the elderly. An analysis of 136 consecutive patients. *Acta Neurochir (Wien).* 1992;118(3-4):98-102.
4. Petridis AK, Dorner L, Doukas A, Eifrig S, Barth H, Mehdorn M. Acute subdural hematoma in the elderly; clinical and CT factors influencing the surgical treatment decision. *Cent Eur Neurosurg.* 2009;70(2):73-78.
5. Tausky P, Hidalgo ET, Landolt H, Fandino J. Age and salvageability: analysis of outcome of patients older than 65 years undergoing craniotomy for acute traumatic subdural hematoma. *World Neurosurg.* 2012;78(3-4):306-311.
6. Benedetto N, Gambacciani C, Montemurro N, Morganti R, Perrini P. Surgical management of acute subdural haematomas in elderly: report of a single center experience. *Br J Neurosurg.* 2017;31(2):244-248.
7. Won SY, Dubinski D, Brawanski N, et al. Significant increase in acute subdural hematoma in octo- and nonagenarians: surgical treatment, functional outcome, and predictors in this patient cohort. *Neurosurg Focus.* 2017;43(5):E10.
8. Monsivais D, Choi HA, Kitagawa R, Franch M, Cai C. A retrospective analysis of surgical outcomes for acute subdural hematoma in an elderly cohort. *Interdisciplinary Neurosurgery.* 2018;14:130-134.
9. Bus S, Verbaan D, Kerklaan BJ, et al. Do older patients with acute or subacute subdural hematoma benefit from surgery? *Br J Neurosurg.* 2019;33(1):51-57.
10. Akbik OS, Starling RV, Gahramanov S, Zhu Y, Lewis J. Mortality and Functional Outcome in Surgically Evacuated Acute Subdural Hematoma in Elderly Patients. *World Neurosurg.* 2019;126:e1235-e1241.
11. Trevisi G, Sturiale CL, Scerrati A, et al. Acute subdural hematoma in the elderly: outcome analysis in a retrospective multicentric series of 213 patients. *Neurosurg Focus.* 2020;49(4):E21.
12. Younsi A, Fischer J, Habel C, et al. Mortality and functional outcome after surgical evacuation of traumatic acute subdural hematomas in octa- and nonagenarians. *Eur J Trauma Emerg Surg.* 2020.
13. Sufaro Y, Avraham E, Alguyn F, Azriel A, Melamed I. Unfavorable functional outcome is expected for elderly patients suffering from acute subdural hematoma even when presenting with preserved level of consciousness. *J Clin Neurosci.* 2019;67:167-171.
14. Massaro F, Lanotte M, Faccani G, Triolo C. One hundred and twenty-seven cases of acute subdural haematoma operated on. Correlation between CT scan findings and outcome. *Acta Neurochir (Wien).* 1996;138(2):185-191.

15. Koc RK, Akdemir H, Oktem IS, Meral M, Menku A. Acute subdural hematoma: outcome and outcome prediction. *Neurosurg Rev.* 1997;20(4):239-244.
16. Merzo A, Lenell S, Nyholm L, Enblad P, Lewen A. Promising clinical outcome of elderly with TBI after modern neurointensive care. *Acta Neurochir (Wien).* 2016;158(1):125-133.
17. Raj R, Mikkonen ED, Kivisaari R, Skrifvars MB, Korja M, Siironen J. Mortality in Elderly Patients Operated for an Acute Subdural Hematoma: A Surgical Case Series. *World Neurosurg.* 2016;88:592-597.
18. Hamed M, Schuss P, Daher FH, et al. Acute Traumatic Subdural Hematoma: Surgical Management in the Presence of Cerebral Herniation-A Single-Center Series and Multivariate Analysis. *World Neurosurg.* 2016;94:501-506.
19. McGinity MJ, Michalek JE, Rodriguez JS, Floyd JR. Surgical evacuation of acute subdural hematoma in octogenarians: a ten-year experience from a single trauma center. *Br J Neurosurg.* 2017;31(6):714-717.
20. Jamjoom A. Justification for evacuating acute subdural haematomas in patients above the age of 75 years. *Injury.* 1992;23(8):518-520.
